# Supplementary material
Source: Research Square preprint supplement (doi:10.21203/rs.3.rs-9078012/v1)
Supplement: Supplementary file 1 [file 3063e1af62eea925b618fdb0.docx]

**Table 1.** Baseline Characteristics of the Study Population

**Table 2.** Comparison of pregnancy outcomes between groups

**Table 3.** Comparison of pregnancy outcomes stratified by gestational age at first detection of low S/D

**Table 4.** Multivariable logistic regression analysis of independent predictors of adverse pregnancy outcomes
